# Supplementary material for: Self-regulation and quality of life in high-functioning young adults with autism
Source: PubMed Central journal article supplement — Autism. 2016 Jul 11;21(7):896–906. doi: 10.1177/1362361316655525 (PMC5625847; doi:10.1177/1362361316655525), 2016-07-11
Supplement: AUT655525supplementarymaterial.pdf [file AUT655525supplementarymaterial.pdf]

Supplementary table 1. Bivariate correlations between variables of interest for the regression analysis in the HFASD group

|                      | BRIEF-A total | BVAQ total cognition | BVAQ total emotion | SRS-A total | QoL total |
|----------------------|---------------|----------------------|--------------------|-------------|-----------|
| Age                  | .268*         | .085                 | -.203              | .223        | -.358*    |
| BRIEF-A total        |               | .003                 | -.325**            | .478**      | -.386**   |
| BVAQ total cognition |               |                      | .173               | .431**      | -.224     |
| BVAQ total emotion   |               |                      |                    | -.261*      | .341**    |
| SRS-A total          |               |                      |                    |             | .584**    |

\* $p < .05$ ; \*\* $p < .001$
